# Supplementary material for: Hypermongone C Accelerates Wound Healing through the Modulation of Inflammatory Factors and Promotion of Fibroblast Migration
Source: PubMed Central journal article supplement (PMC6572485; doi:10.3390/molecules24102022), 2019-05-27
Supplement: molecules-24-02022-s001.pdf [file molecules-24-02022-s001.pdf]

# Hypermongone C accelerates wound healing through the modulation of inflammatory factors and promotion of fibroblast migration

Sara E. Moghadam <sup>1</sup>, Mahdi Moridi Farimani <sup>2</sup>, Sara Soroury<sup>3</sup>, Samad N. Ebrahimi<sup>2</sup>, and Ehsan Jabbarzadeh <sup>1,4,\*</sup>

<sup>1</sup> Department of Chemical Engineering, University of South Carolina, Columbia, SC, 29208, USA; eslambol@mailbox.sc.edu

<sup>2</sup> Department of Phytochemistry, Medicinal Plants and Drug Research Institute, Shahid Beheshti University, GC, Evin, Tehran, 1983969411, Iran; m\_moridi@sbu.ac.ir; s\_ebrahimi@sbu.ac.ir

<sup>3</sup> Department of Phytochemistry, Faculty of Science, Golestan University, Gorgan, 49138157559, Iran; sarasoroury@gmail.com

<sup>4</sup> Biomedical Engineering Program, University of South Carolina, Columbia, SC, 29208, USA; ehsan@sc.edu

\* Correspondence: ehsan@sc.edu, Tel.: (803) 777-3297

# Supplementary Data

(A)

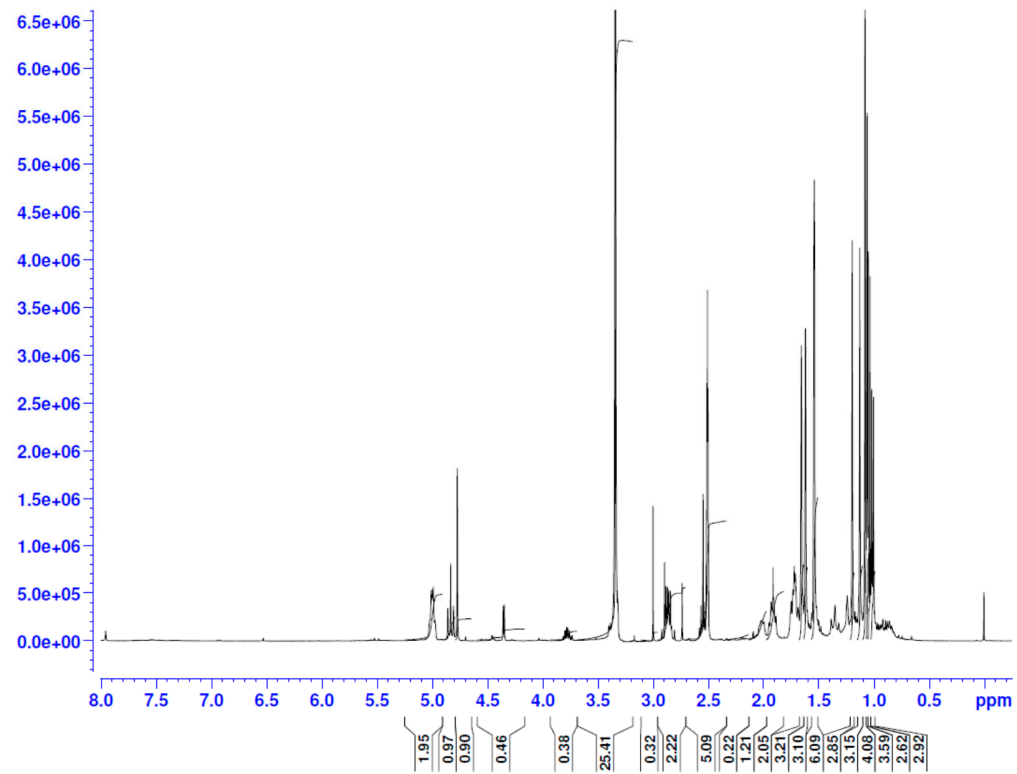

(B)

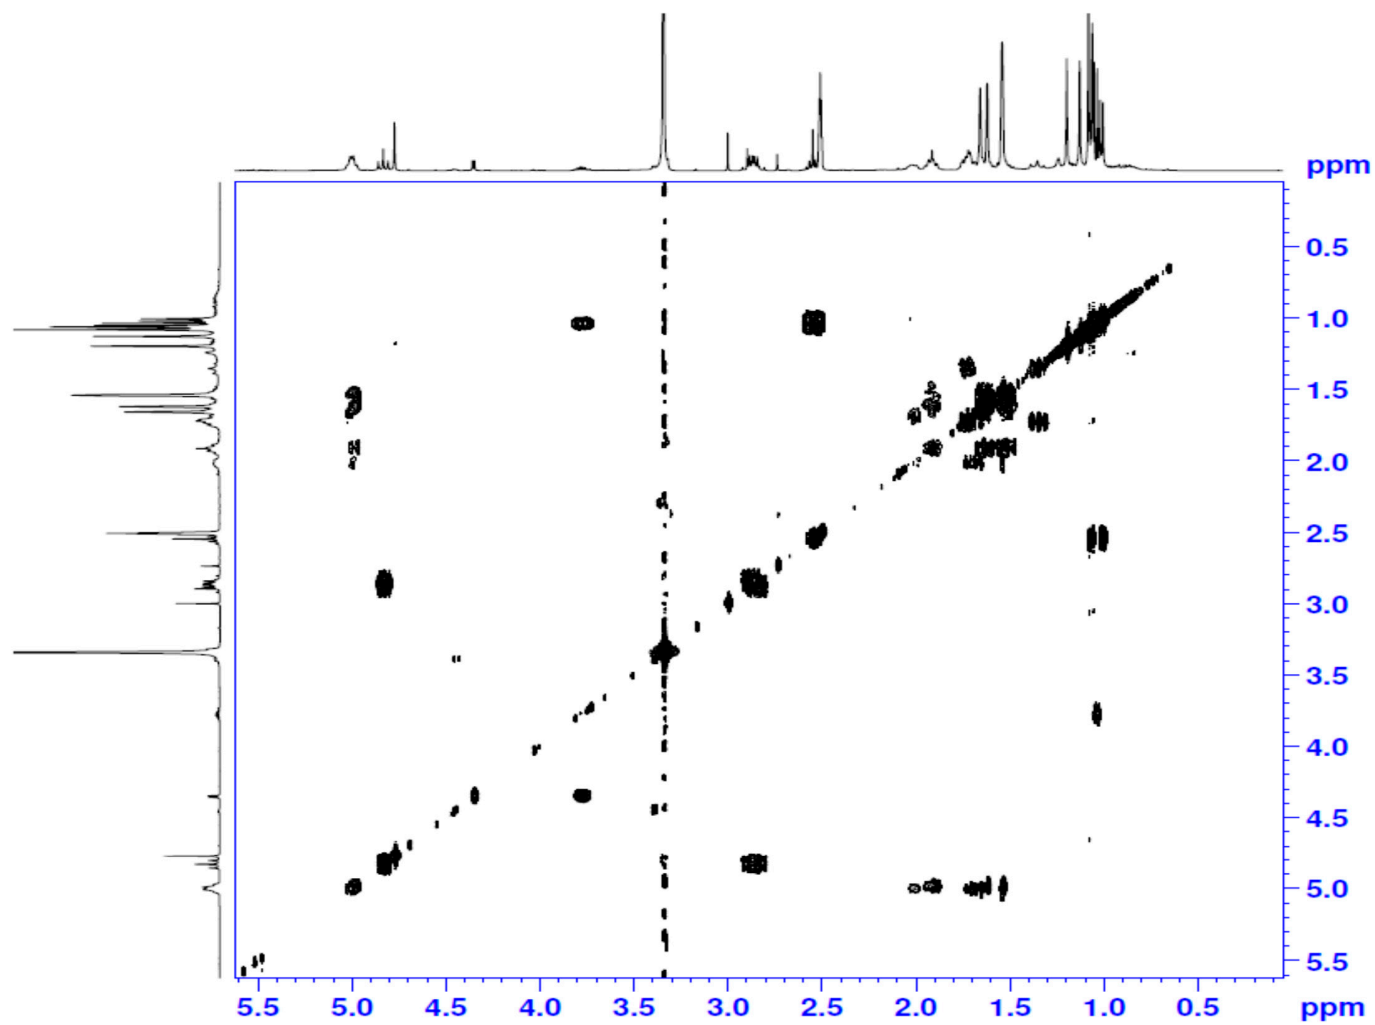

(C)

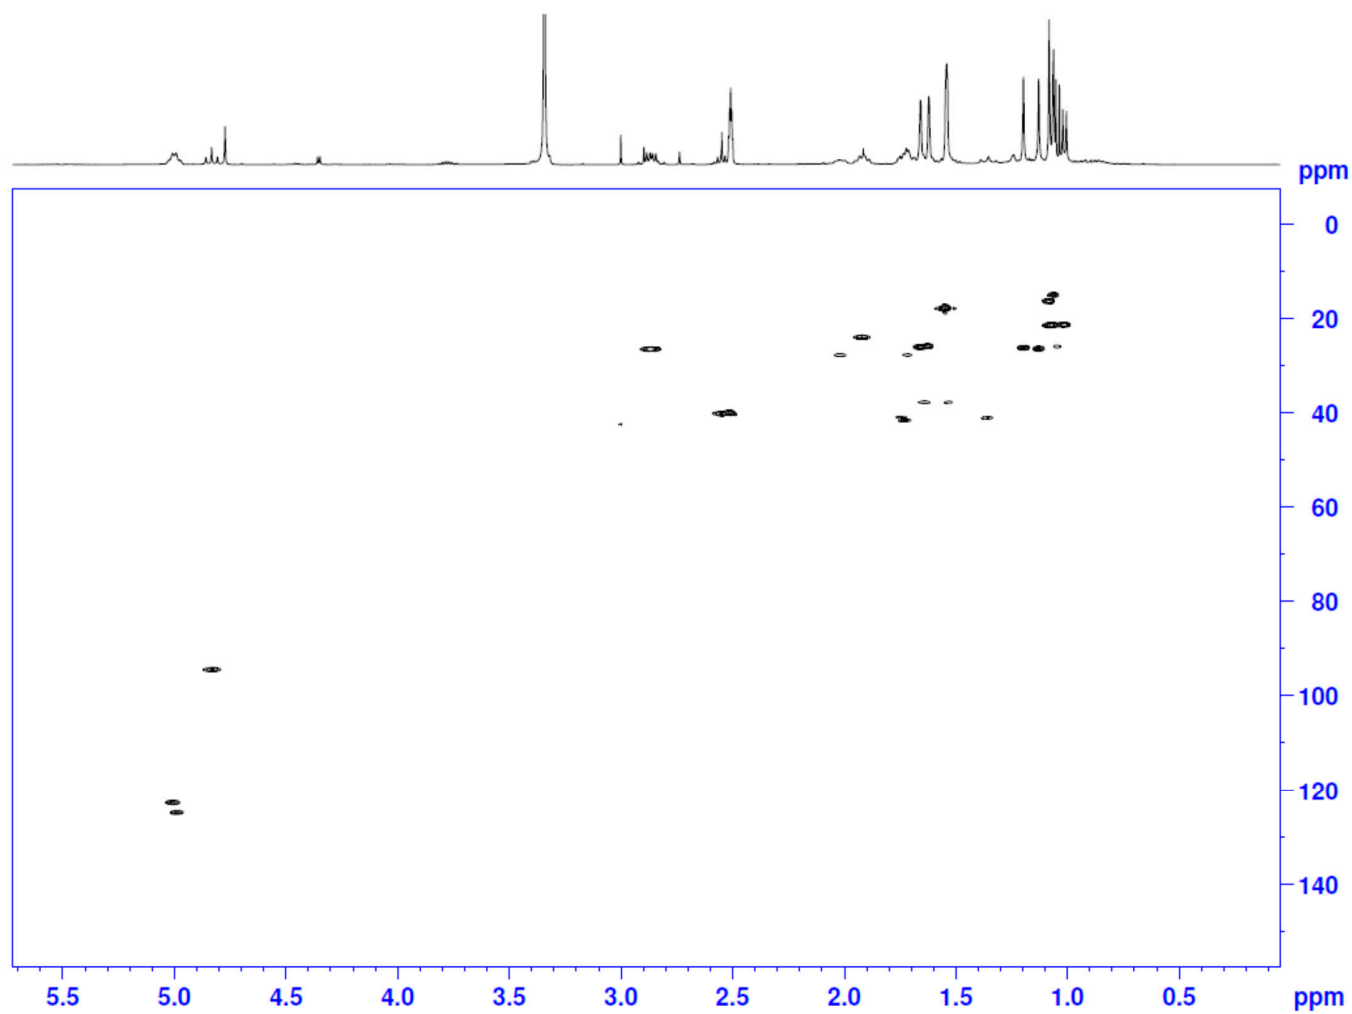

(D)

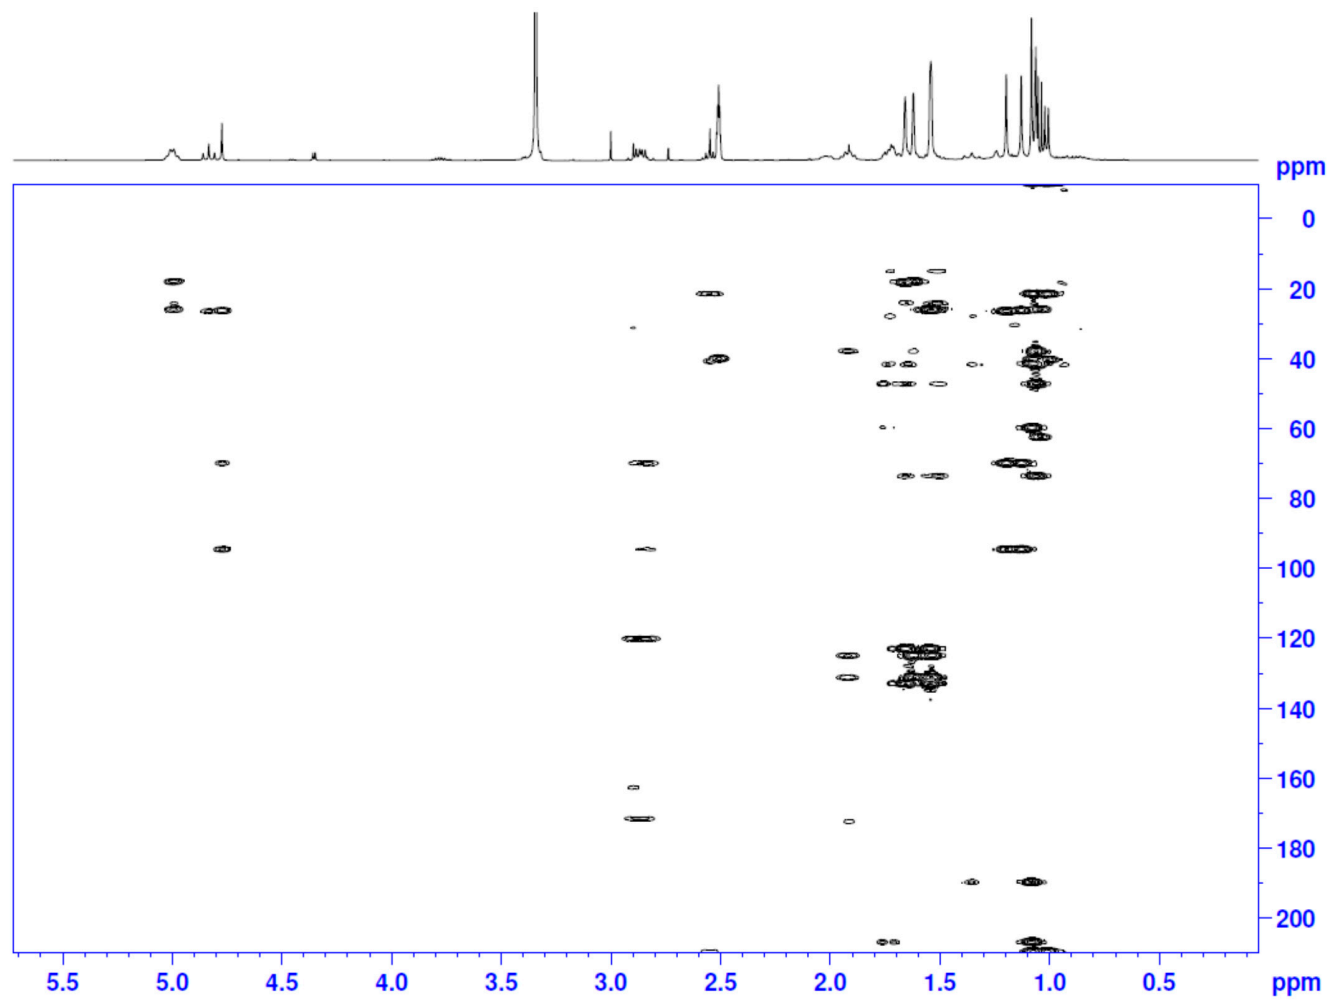

**Figure S1.** The (A) <sup>1</sup>H-NMR, (B) H-H COSY, (C) HSQC, and (D) HMBC spectra of Hypermongone C in DMSO-d<sub>6</sub>.

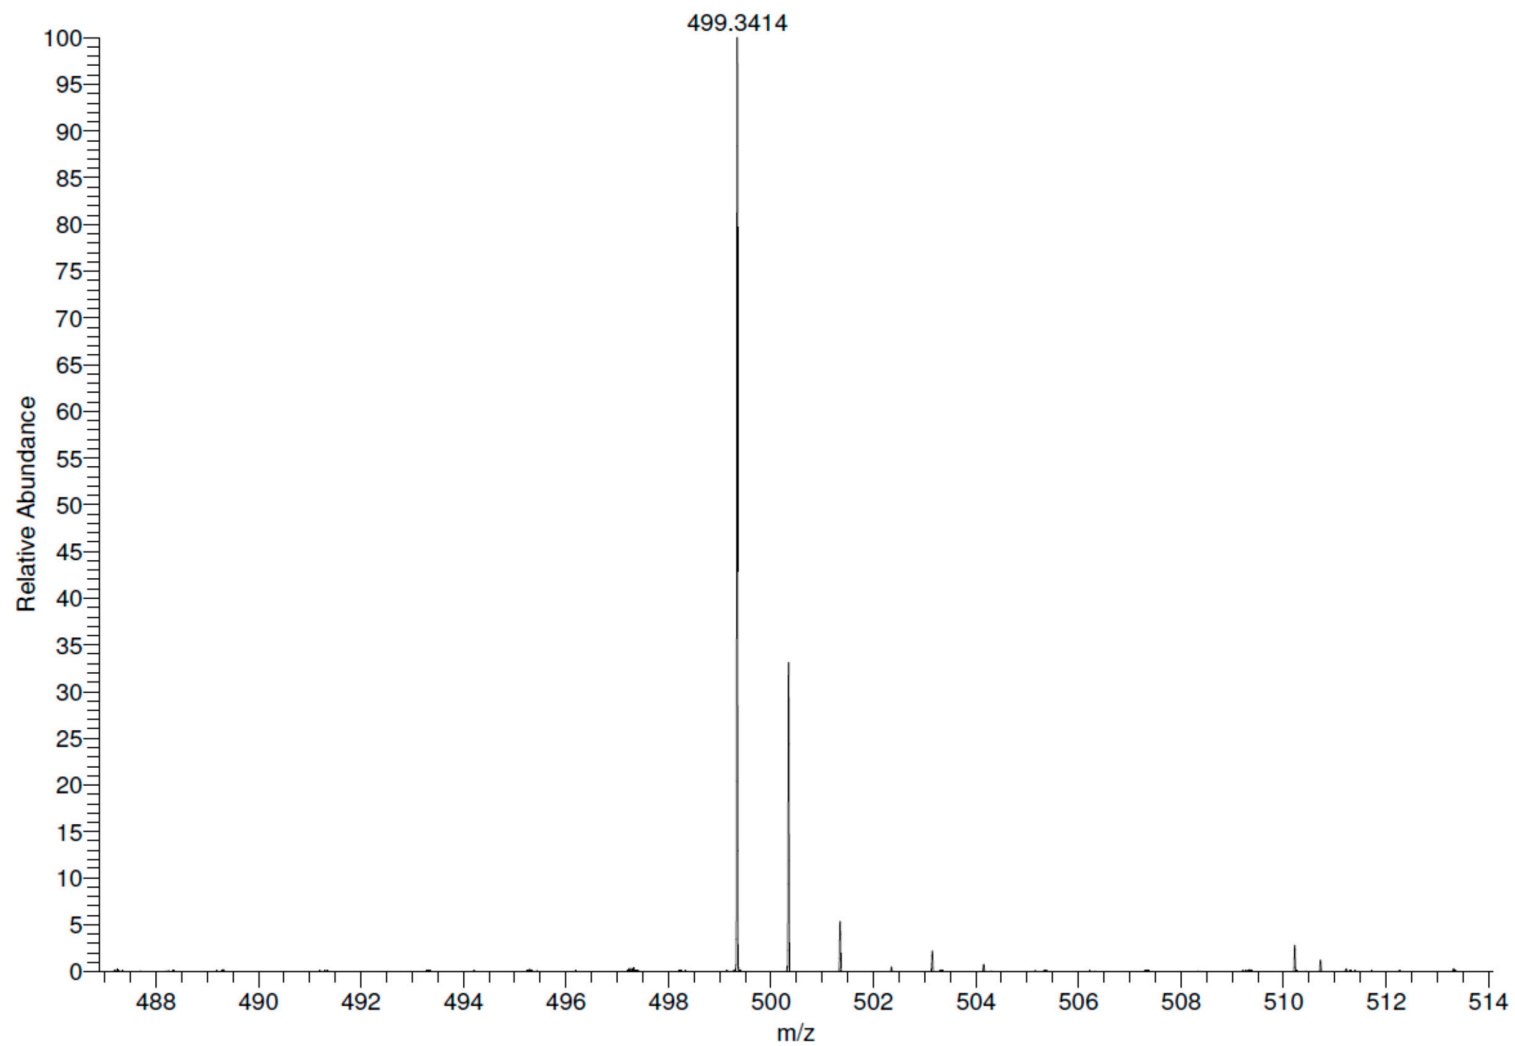

**Figure S2.** High resolution mass spectrometry of Hypermongone C in positive mode.

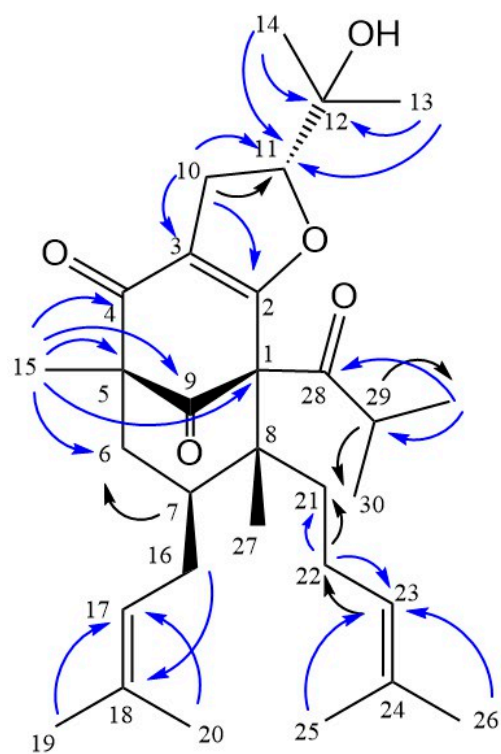

**Figure S3.** H-H COSY ( —→) and HMBC ( - -→) correlations

**Table S1.** <sup>1</sup>H and <sup>13</sup>C NMR data (400 and 100 MHz, in DMSO-d<sub>6</sub>) of compound hypermongone C

| position | $\delta_{\text{H}}$ | $\delta_{\text{C}}$ | position | $\delta_{\text{H}}$ | $\delta_{\text{C}}$ |
|----------|---------------------|---------------------|----------|---------------------|---------------------|
| 1        | -                   | 73.6                | 31       | 1.01 (d)            | 20.6                |
| 2        | -                   | 171.7               |          |                     |                     |
| 3        |                     | 120.2               |          |                     |                     |
| 4        |                     | 189.8               |          |                     |                     |
| 5        |                     | 59.7                |          |                     |                     |
| 6a       | 1.74 (dd)           | 41.1                |          |                     |                     |
| 6b       | 1.36 (t)            | 41.1                |          |                     |                     |
| 7        | 1.73 (m)            | 41.8                |          |                     |                     |
| 8        |                     | 47.3                |          |                     |                     |
| 9        |                     | 207.0               |          |                     |                     |
| 10a      | 2.89 (dd)           | 26.6                |          |                     |                     |
| 10b      | 2.84 (dd)           | 26.6                |          |                     |                     |
| 11       | 4.80 (t)            | 93.5                |          |                     |                     |
| 12       |                     | 70.1                |          |                     |                     |
| 13       | 1.12 (s)            | 25.9                |          |                     |                     |
| 14       | 1.19 (s)            | 26.1                |          |                     |                     |
| 15       | 1.08 (s)            | 16.4                |          |                     |                     |
| 16a      | 2.02 (m)            | 27.8                |          |                     |                     |
| 16b      | 1.72 (m)            | 27.8                |          |                     |                     |
| 17       | 4.9 (m)             | 124.9               |          |                     |                     |
| 18       |                     | 133.0               |          |                     |                     |
| 19       | 1.54 (bs)           | 18.0                |          |                     |                     |
| 20       | 1.63 (s)            | 25.9                |          |                     |                     |
| 21a      | 1.64 (m)            | 37.9                |          |                     |                     |
| 21b      | 1.53 (bs)           | 37.9                |          |                     |                     |
| 22a      | 1.93 (m)            | 24.0                |          |                     |                     |
| 22b      | 1.90 (m)            | 24.0                |          |                     |                     |
| 23       | 5.00 (m)            | 122.0               |          |                     |                     |
| 24       |                     | 131.3               |          |                     |                     |
| 25       | 1.54 (bs)           | 18.0                |          |                     |                     |
| 26       | 1.66 (s)            | 25.9                |          |                     |                     |
| 27       | 1.06 (s)            | 15.0                |          |                     |                     |
| 28       |                     | 209.0               |          |                     |                     |
| 29       | 2.55 (m)            | 40.3                |          |                     |                     |
| 30       | 1.08 (d)            | 20.6                |          |                     |                     |



**Table S2.** Primers used for quantitative real-time polymerase chain reaction.

| <b>Gene</b>   | <b>5'-3' primer sequences: (F: forward R: reverse)</b> |
|---------------|--------------------------------------------------------|
| TNF- $\alpha$ | F: CTG CTG CAC TTT GGA GTG AT                          |
|               | R: AGA TGA TCT GAC TGC CTG GG                          |
| IL-6          | F: AGC CAC TCA CCT CTT CAG AAC                         |
|               | R: GCC TCT TTG CTG CTT TCA CAC                         |
| VEGF-A        | F: AGC CTT GCC TTG CTG CTC TA                          |
|               | R: GTG CTG GCC TTG GTG AGG                             |
| GAPDH         | F: GTG GAC CTG ACC TGC CGT CT                          |
|               | F: GGA GGA GTG GGT GTC GCT GT                          |
